# Supplementary material
Source: publisher site journal article supplement (https://neobiota.pensoft.net/article/61673/download/suppl/33/)
Supplement: Supplementary file 1

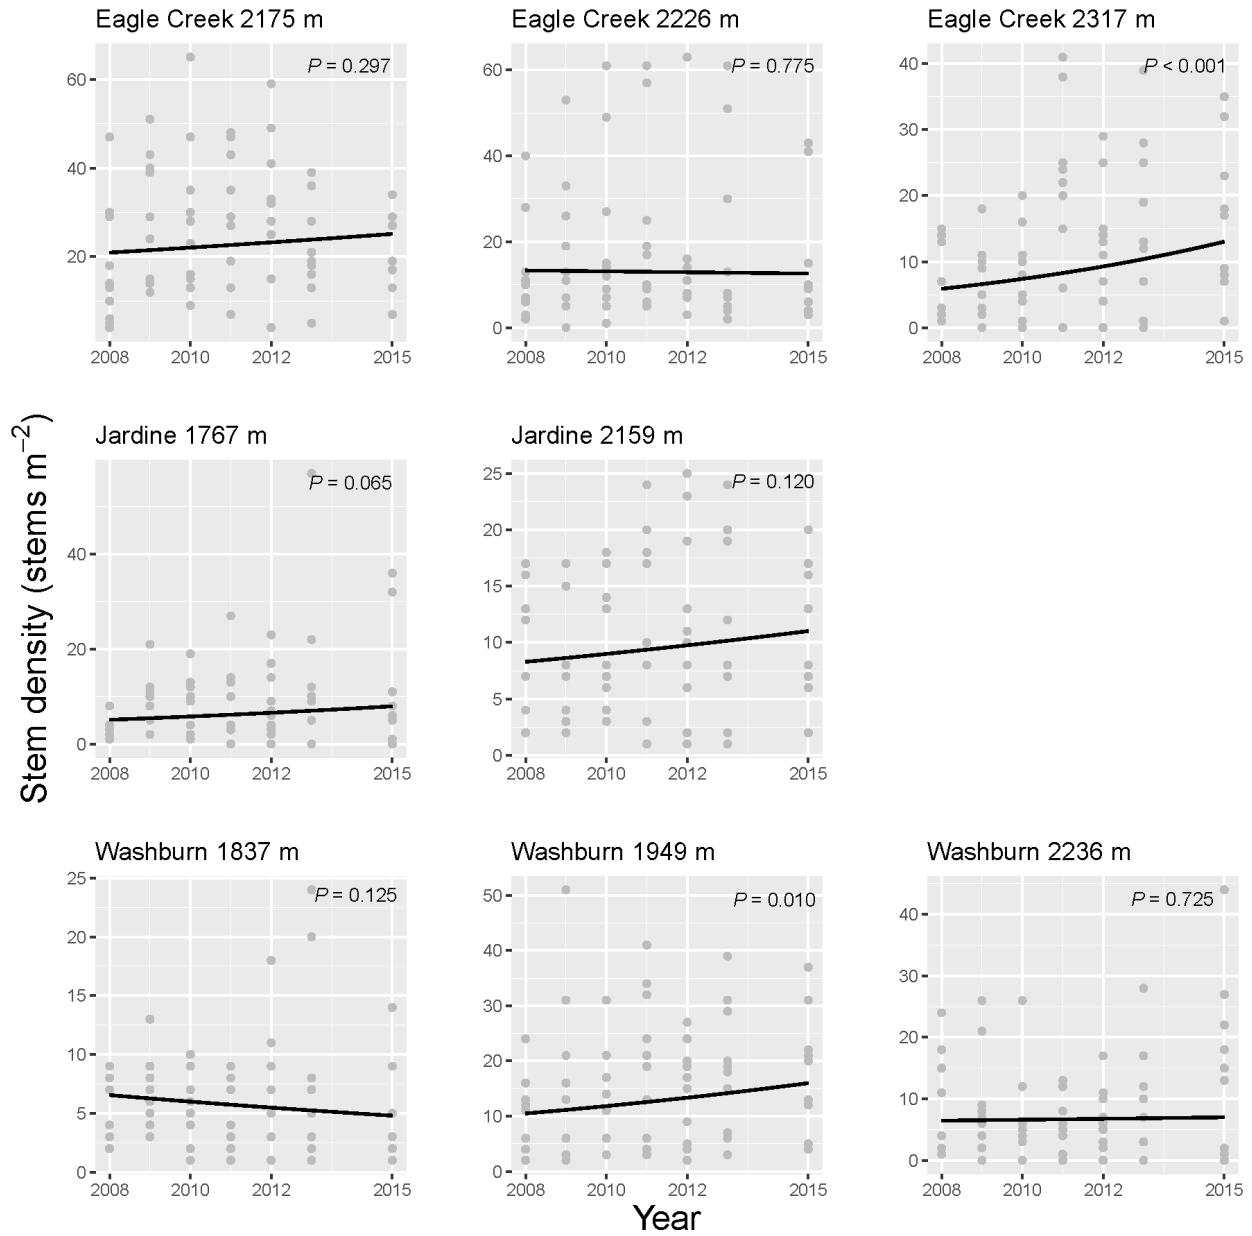

**Supplementary Figure 3.** *Linaria dalmatica* stem density (stems  $m^{-2}$ ) over the course of the study (2008 – 2013, 2015) at those sites with stable/growing populations. Each site is identified by road and elevation.
